# Supplementary material for: Cellular Phone Use and Risk of Tumors: Systematic Review and Meta-Analysis
Source: PubMed Central journal article supplement (PMC7663653; doi:10.3390/ijerph17218079), 2020-11-02
Supplement: ijerph-17-08079-s001.pdf [file ijerph-17-08079-s001.pdf]

**Table S1.** Methodological Quality of Case-Control Studies Based on the Newcastle-Ottawa Scale ( $n = 46$ ).

| Study Name                   | Selection                            |                                     |                       | Comparability          |                                                   | Exposure                          |                                               |                   | Outcome |
|------------------------------|--------------------------------------|-------------------------------------|-----------------------|------------------------|---------------------------------------------------|-----------------------------------|-----------------------------------------------|-------------------|---------|
|                              | Adequate Definition of Patient Cases | Representativeness of Patient Cases | Selection of Controls | Definition of Controls | Control for Important Factor or Additional Factor | Assessment of Exposure (Blinding) | Same Method of Ascertainment for Participants | Non-response Rate |         |
| Hardell et al.'s studies     |                                      |                                     |                       |                        |                                                   |                                   |                                               |                   |         |
| Hardell et al., 1999 [13]    | 1                                    | 1                                   | 1                     | 0                      | 2                                                 | 1                                 | 1                                             | 1                 | 8       |
| Hardell et al., 2002 [14]    | 0                                    | 1                                   | 1                     | 0                      | 2                                                 | 1                                 | 1                                             | 1                 | 7       |
| Hardell et al., 2003 [15]    | 1                                    | 1                                   | 1                     | 0                      | 2                                                 | 0                                 | 1                                             | 0                 | 6       |
| Hardell et al., 2004 [16]    | 0                                    | 1                                   | 1                     | 0                      | 2                                                 | 1                                 | 1                                             | 1                 | 7       |
| Hardell et al., 2005 [17]    | 1                                    | 1                                   | 1                     | 0                      | 2                                                 | 0                                 | 1                                             | 1                 | 7       |
| Hardell et al., 2006 [18]    | 0                                    | 1                                   | 1                     | 0                      | 2                                                 | 1                                 | 1                                             | 1                 | 7       |
| Hardell et al., 2007 [19]    | 0                                    | 1                                   | 1                     | 0                      | 2                                                 | 1                                 | 1                                             | 1                 | 7       |
| Hardell et al., 2010 [20]    | 0                                    | 1                                   | 1                     | 1                      | 2                                                 | 0                                 | 1                                             | 1                 | 7       |
| Hardell et al., 2011 [21]    | 0                                    | 1                                   | 1                     | 0                      | 2                                                 | 1                                 | 1                                             | 1                 | 7       |
| Soderqvist et al., 2012 [22] | 1                                    | 1                                   | 1                     | 0                      | 2                                                 | 0                                 | 1                                             | 1                 | 7       |
| Hardell et al., 2013 [23]    | 0                                    | 1                                   | 1                     | 0                      | 2                                                 | 1                                 | 1                                             | 1                 | 7       |

| <b>INTERPHONE-related studies</b>    |   |   |   |   |   |   |   |   |   |
|--------------------------------------|---|---|---|---|---|---|---|---|---|
| Christensen et al., 2004 [24]        | 1 | 0 | 1 | 1 | 2 | 0 | 1 | 0 | 6 |
| Lönn et al., <sup>25)</sup> 2004     | 1 | 1 | 1 | 0 | 2 | 0 | 1 | 0 | 6 |
| Christensen et al., 2005 [26]        | 1 | 1 | 1 | 1 | 2 | 0 | 1 | 0 | 7 |
| Lönn et al., 2005 [27]               | 1 | 1 | 1 | 0 | 2 | 0 | 1 | 0 | 6 |
| Schoemaker et al., 2005 [28]         | 1 | 1 | 1 | 1 | 2 | 0 | 1 | 0 | 7 |
| Hepworth et al., 2006 [29]           | 1 | 1 | 1 | 1 | 2 | 1 | 0 | 1 | 8 |
| Schuz et al., 2006 [30]              | 1 | 1 | 1 | 0 | 2 | 0 | 1 | 0 | 6 |
| Lönn et al., 2006 [31]               | 1 | 1 | 1 | 0 | 2 | 0 | 1 | 0 | 6 |
| Takebayashi et al., 2006 [32]        | 1 | 1 | 1 | 0 | 2 | 0 | 1 | 1 | 7 |
| Klaeboe et al., 2007 [33]            | 1 | 1 | 1 | 1 | 2 | 0 | 1 | 1 | 8 |
| Lahkola et al., 2007 [34]            | 1 | 1 | 1 | 0 | 2 | 0 | 1 | 0 | 6 |
| Schlehofer et al., 2007 [35]         | 1 | 1 | 1 | 0 | 2 | 0 | 1 | 0 | 6 |
| Lahkola et al., 2008 [36]            | 1 | 1 | 1 | 0 | 2 | 0 | 1 | 0 | 6 |
| Sadetzki et al., <sup>37)</sup> 2008 | 1 | 1 | 1 | 0 | 1 | 0 | 1 | 0 | 5 |
| Takebayashi et al., 2008 [38]        | 1 | 1 | 1 | 0 | 2 | 0 | 1 | 0 | 6 |

|                                                |   |   |   |   |   |   |   |   |   |
|------------------------------------------------|---|---|---|---|---|---|---|---|---|
| Schoemaker et al.,<br>2009 [39]                | 1 | 1 | 1 | 1 | 2 | 0 | 1 | 0 | 7 |
| The<br>INTERPHONE<br>Study Group, 2010<br>[40] | 1 | 1 | 1 | 0 | 2 | 1 | 1 | 0 | 7 |
| The<br>INTERPHONE<br>Study Group, 2011<br>[41] | 1 | 1 | 1 | 0 | 2 | 0 | 1 | 0 | 6 |
| Shrestha et al.,<br>2015 [42]                  | 1 | 1 | 1 | 0 | 1 | 0 | 1 | 0 | 5 |
| <b>Studies by other<br/>groups</b>             |   |   |   |   |   |   |   |   |   |
| Muscat et al., 2000<br>[43]                    | 1 | 1 | 0 | 1 | 2 | 0 | 1 | 1 | 7 |
| Inskip et al., 2001<br>[44]                    | 1 | 1 | 0 | 0 | 2 | 0 | 1 | 1 | 6 |
| Auvinen et al.,<br>2002 [45]                   | 0 | 1 | 1 | 0 | 2 | 1 | 1 | 0 | 6 |
| Warren et al., 2003<br>[46]                    | 1 | 0 | 1 | 0 | 2 | 1 | 1 | 0 | 6 |
| Linet et al., 2006<br>[47]                     | 1 | 1 | 1 | 1 | 2 | 0 | 1 | 0 | 7 |
| Kaufman et al.,<br>2009 [48]                   | 1 | 0 | 0 | 0 | 2 | 1 | 1 | 0 | 6 |
| Stang et al., 2009<br>[49]                     | 1 | 0 | 1 | 0 | 2 | 0 | 1 | 0 | 5 |
| Cooke et al., 2010<br>[50]                     | 1 | 1 | 0 | 1 | 2 | 0 | 1 | 0 | 6 |
| Spinelli et al., 2010<br>[51]                  | 1 | 1 | 0 | 1 | 1 | 0 | 1 | 0 | 5 |

|                                 |   |   |   |   |   |   |   |   |   |
|---------------------------------|---|---|---|---|---|---|---|---|---|
| Aydin et al., 2011<br>[52]      | 1 | 1 | 1 | 0 | 2 | 1 | 1 | 0 | 7 |
| Duan et al., 2011<br>[53]       | 1 | 0 | 0 | 1 | 2 | 0 | 0 | 0 | 4 |
| Corona et al., 2012<br>[54]     | 1 | 1 | 0 | 1 | 0 | 1 | 1 | 1 | 6 |
| Coureau et al.,<br>2014 [55]    | 0 | 1 | 1 | 1 | 2 | 0 | 1 | 0 | 6 |
| Feltbower et al.,<br>2014 [56]  | 1 | 1 | 1 | 1 | 2 | 0 | 1 | 0 | 7 |
| Pettersson et al.,<br>2014 [57] | 1 | 1 | 1 | 0 | 2 | 0 | 1 | 0 | 6 |
| Yoon et al., 2015<br>[58]       | 1 | 1 | 0 | 1 | 2 | 0 | 1 | 1 | 7 |

Each study is awarded a maximum of one star for each item within the selection and exposure categories, while a maximum of two stars can be given for the comparability category.

**Table 2.** Methodological Quality of Case-control Studies Based on the National Heart, Lung, and Blood Institute quality assessment tool of case-control studies ( $n = 46$ ).

| Study Name                         | Research Question | Study Population | Sample Size Justification | Groups Recruited from the Same Population | Selection Criteria | Case and control definitions | Random selection of study participants | Concurrent controls | Exposure assessed prior to outcome measurement | Exposure measures and assessment | Blinding of exposure assessors | Statistical analysis | No. of 'Yes' |
|------------------------------------|-------------------|------------------|---------------------------|-------------------------------------------|--------------------|------------------------------|----------------------------------------|---------------------|------------------------------------------------|----------------------------------|--------------------------------|----------------------|--------------|
| <b>Hardell et al.'s studies</b>    |                   |                  |                           |                                           |                    |                              |                                        |                     |                                                |                                  |                                |                      |              |
| Hardell et al., 1999 [13]          | Y                 | Y                | NA                        | Y                                         | Y                  | NR                           | NR                                     | Y                   | Y                                              | Y                                | Y                              | N                    | 8            |
| Hardell et al., <sup>14</sup> 2002 | Y                 | Y                | NA                        | Y                                         | Y                  | NR                           | Y                                      | Y                   | Y                                              | Y                                | Y                              | Y                    | 10           |
| Hardell et al., 2003 [15]          | Y                 | Y                | NA                        | Y                                         | Y                  | NR                           | Y                                      | NR                  | Y                                              | Y                                | Y                              | Y                    | 9            |
| Hardell et al., 2004 [16]          | Y                 | Y                | NA                        | Y                                         | Y                  | NR                           | Y                                      | Y                   | Y                                              | Y                                | Y                              | Y                    | 10           |
| Hardell et al., 2005 [17]          | Y                 | Y                | NA                        | Y                                         | Y                  | NR                           | Y                                      | Y                   | Y                                              | Y                                | Y                              | Y                    | 10           |
| Hardell et al., 2006 [18]          | Y                 | Y                | NA                        | Y                                         | Y                  | NR                           | Y                                      | Y                   | Y                                              | Y                                | Y                              | Y                    | 10           |
| Hardell et al., 2007 [19]          | Y                 | Y                | NA                        | Y                                         | Y                  | NR                           | Y                                      | Y                   | Y                                              | Y                                | Y                              | Y                    | 10           |
| Hardell et al., 2010 [20]          | Y                 | Y                | NA                        | Y                                         | Y                  | Y                            | NR                                     | Y                   | Y                                              | Y                                | NR                             | Y                    | 9            |
| Hardell et al., 2011 [21]          | Y                 | Y                | NA                        | Y                                         | Y                  | NR                           | NR                                     | Y                   | Y                                              | Y                                | Y                              | Y                    | 9            |

|                                   |   |   |    |   |   |    |   |    |   |   |    |   |    |
|-----------------------------------|---|---|----|---|---|----|---|----|---|---|----|---|----|
| Soderqvist et al., 2012 [22]      | Y | Y | NA | Y | Y | NR | Y | NR | Y | Y | NR | N | 7  |
| Hardell et al., 2013 [23]         | Y | Y | NA | Y | Y | NR | Y | Y  | Y | Y | Y  | Y | 10 |
| <b>INTERPHONE-related studies</b> |   |   |    |   |   |    |   |    |   |   |    |   |    |
| Christensen et al., 2004 [24]     | Y | Y | NA | Y | Y | Y  | Y | NR | Y | Y | NR | Y | 9  |
| Lönn et al., 2004 [25]            | Y | Y | NA | Y | Y | NR | Y | Y  | Y | Y | NR | Y | 9  |
| Christensen et al., 2005 [26]     | Y | Y | NA | Y | Y | Y  | Y | Y  | Y | Y | NR | Y | 10 |
| Lönn et al., 2005 [27]            | Y | Y | NA | Y | Y | NR | Y | Y  | Y | Y | NR | Y | 9  |
| Schoemaker et al., 2005 [28]      | Y | Y | NA | Y | Y | Y  | Y | NR | Y | Y | NR | Y | 9  |
| Hepworth et al., 2006 [29]        | Y | Y | NA | N | Y | NR | Y | NR | Y | Y | NR | Y | 7  |
| Schuz et al., 2006 [30]           | Y | Y | NA | Y | Y | NR | Y | NR | Y | Y | NR | Y | 8  |
| Lönn et al., 2006 [31]            | Y | Y | NA | Y | Y | NR | Y | Y  | Y | Y | NR | Y | 9  |
| Takebayashi et al., 2006 [32]     | Y | Y | NA | N | Y | NR | Y | NR | Y | Y | NR | Y | 7  |

|                                        |   |   |    |    |   |    |    |    |   |   |    |   |   |
|----------------------------------------|---|---|----|----|---|----|----|----|---|---|----|---|---|
| Klaeboe et al., 2007 [33]              | Y | Y | NA | Y  | Y | Y  | Y  | NO | Y | Y | NR | Y | 9 |
| Lahkola et al., 2007 [34]              | Y | Y | NA | NA | Y | NA | Y  | NR | Y | Y | NR | Y | 7 |
| Schlehofer et al., 2007 [35]           | Y | Y | NA | N  | Y | NR | Y  | NR | Y | Y | NR | Y | 7 |
| Lahkola et al., 2008 [36]              | Y | Y | NA | Y  | Y | NA | Y  | NR | Y | Y | NR | Y | 8 |
| Sadetzki et al., 2008 [37]             | Y | Y | NA | Y  | Y | NR | Y  | NR | Y | Y | NR | Y | 8 |
| Takebayashi et al., 2008 [38]          | Y | Y | NA | N  | Y | NR | Y  | NR | Y | Y | NR | Y | 7 |
| Schoemaker et al., 2009 [39]           | Y | Y | NA | N  | Y | Y  | CD | NR | Y | Y | NR | Y | 7 |
| The INTERPH ONE Study Group, 2010 [40] | Y | Y | NA | N  | Y | NA | NA | NR | Y | Y | NR | Y | 6 |
| The INTERPH ONE Study Group, 2011 [41] | Y | Y | NA | N  | Y | NA | NA | NR | Y | Y | NR | Y | 6 |
| Shrestha et al., 2015 [42]             | Y | Y | NA | Y  | Y | NR | NR | NR | Y | Y | NR | Y | 7 |

| <b>Studies by other groups</b> |   |   |    |    |   |    |    |    |   |   |    |   |   |
|--------------------------------|---|---|----|----|---|----|----|----|---|---|----|---|---|
| Muscat et al., 2000 [43]       | Y | Y | NA | Y  | Y | Y  | N  | Y  | Y | Y | NR | Y | 9 |
| Inskip et al., 2001 [44]       | Y | Y | NA | Y  | Y | Y  | NR | Y  | Y | Y | NR | Y | 9 |
| Auvinen et al., 2002 [45]      | Y | Y | NA | Y  | Y | Y  | NR | NR | Y | Y | NR | Y | 8 |
| Warren et al., 2003 [46]       | Y | Y | NA | Y  | Y | Y  | NR | NR | Y | Y | NR | Y | 8 |
| Linnet et al., 2006 [47]       | Y | Y | NA | Y  | Y | Y  | Y  | NR | Y | Y | NR | Y | 9 |
| Kaufman et al., 2009 [48]      | Y | Y | NA | CD | Y | Y  | NR | NR | Y | Y | NR | Y | 7 |
| Stang et al., 2009 [49]        | Y | Y | NA | CD | Y | Y  | NR | NR | Y | Y | NR | Y | 7 |
| Cooke et al., 2010 [50]        | Y | Y | NA | N  | Y | Y  | N  | NR | Y | Y | NR | Y | 7 |
| Spinelli et al., 2010 [51]     | Y | Y | NA | Y  | Y | Y  | Y  | NR | Y | Y | NR | Y | 9 |
| Aydin et al., 2011 [52]        | Y | Y | NA | Y  | Y | NR | Y  | Y  | Y | Y | NR | Y | 9 |
| Duan et al., 2011 [53]         | Y | Y | NA | Y  | Y | Y  | NR | NR | Y | Y | NR | Y | 8 |



|                              |   |   |    |    |   |    |    |    |   |   |    |   |   |
|------------------------------|---|---|----|----|---|----|----|----|---|---|----|---|---|
| Corona et al., 2012 [54]     | Y | Y | NA | Y  | Y | Y  | NR | Y  | Y | Y | NR | Y | 9 |
| Coureau et al., 2014 [55]    | Y | Y | NA | Y  | Y | Y  | Y  | NR | Y | Y | NR | Y | 9 |
| Feltbower et al., 2014 [56]  | Y | Y | NA | CD | Y | NR | Y  | NR | Y | Y | NR | Y | 7 |
| Pettersson et al., 2014 [57] | Y | Y | NA | Y  | Y | CD | Y  | Y  | Y | Y | NR | Y | 9 |
| Yoon et al., 2015 [58]       | Y | Y | NA | Y  | Y | Y  | Y  | NR | Y | Y | NR | Y | 9 |

Y, yes; N, no; NA, not applicable; NR, not reported; CD, cannot determine.

**Table S3.** Cellular Phone Use and Risk of Tumors in Subgroup Meta-analysis by Type of Tumor.

|                    |                                                  | All |                      |                    | Hardell et al.'s Studies |                            |                    | INTERPHONE-Related studies |                      |                    | Studies by Other Groups |                     |                    |
|--------------------|--------------------------------------------------|-----|----------------------|--------------------|--------------------------|----------------------------|--------------------|----------------------------|----------------------|--------------------|-------------------------|---------------------|--------------------|
|                    |                                                  | No  | OR (95% CI)          | I <sup>2</sup> (%) | No                       | OR (95% CI)                | I <sup>2</sup> (%) | No                         | OR (95% CI)          | I <sup>2</sup> (%) | No                      | OR (95% CI)         | I <sup>2</sup> (%) |
| <b>Brain tumor</b> | <b>All</b>                                       | 23  | 0.99 (0.88 to 1.12)  | 59.8               | 5                        | 1.32 (0.99 to 1.76)        | 67.9               | 6                          | 0.80 (0.71 to 0.90)  | 32.6               | 12                      | 1.02 (0.90 to 1.15) | 0.0                |
| <b>Malignancy</b>  | <b>Malignant</b>                                 | 14  | 1.12 (0.95 to 1.32)  | 58.0               | 5                        | <b>1.35 (1.06 to 1.73)</b> | 53.9               | 1                          | 0.81 (0.70 to 0.94)  | -                  | 8                       | 1.02 (0.86 to 1.21) | 0.0                |
|                    | <b>Benign</b>                                    | 15  | 0.87 (0.78 to 0.96)  | 17.3               | 3                        | 0.94 (0.77 to 1.15)        | 0.0                | 5                          | 0.79 (0.67 to 0.95)  | 46.0               | 7                       | 0.97 (0.80 to 1.17) | 0.0                |
| <b>Type</b>        | <b>Glioma</b>                                    | 12  | 1.07 (0.90 to 1.29)  | 54.1               | 3                        | 1.40 (0.86 to 2.28)        | 76.1               | 1                          | 0.81 (0.70 to 0.94)  | -                  | 8                       | 1.04 (0.87 to 1.24) | 0.0                |
|                    | <b>Time since first use or latency ≥10 years</b> | 3   | 1.66 (0.80 to 3.44)  | 81.0               | 1                        | 3.60 (1.63 to 7.95)        | -                  | 1                          | 0.98 (0.76 to 1.26)  | -                  | 1                       | 1.61 (0.84 to 3.07) | -                  |
|                    | <b>Meningioma</b>                                | 6   | 0.81 (0.72 to 0.90)  | 0.0                | 2                        | 0.82 (0.64 to 1.06)        | 0.0                | 1                          | 0.79 (0.68 to 0.91)  | -                  | 3                       | 0.85 (0.64 to 1.12) | 0.0                |
|                    | <b>Acoustic neuroma</b>                          | 6   | 1.00 (0.83 to 1.19)  | 13.9               | 2                        | 1.20 (0.79 to 1.83)        | 0.0                | 1                          | 0.85 (0.69 to 1.04)  | -                  | 3                       | 1.10 (0.84 to 1.46) | 6.7                |
|                    | <b>Pituitary tumor</b>                           | 3   | 0.71 (0.42 to 1.20). | 71.5               |                          | n.a.                       |                    | 3                          | 0.71 (0.42 to 1.20). | 71.5               |                         | n.a.                |                    |
| <b>Others</b>      | <b>All</b>                                       | 14  | 0.98 (0.89 to 1.09)  | 0.0                | 5                        | 1.03 (0.88 to 1.21)        | 0.0                | 3                          | 0.85 (0.69 to 1.05)  | 0.0                | 6                       | 1.03 (0.83 to 1.28) | 37.5               |
| <b>Malignancy</b>  | <b>Malignant</b>                                 | 12  | 1.01 (0.91 to 1.13)  | 0.0                | 4                        | 1.04 (0.88 to 1.22)        | 0.0                | 2                          | 0.84 (0.54 to 1.31)  | 0.0                | 6                       | 1.03 (0.83 to 1.28) | 37.5               |
|                    | <b>Benign</b>                                    | 3   | 0.88 (0.69 to 1.12)  | 0.0                | 1                        | 2.51 (0.40 to 15.67)       | -                  | 2                          | 0.86 (0.67 to 1.10)  | 0.0                |                         | n.a.                |                    |
| <b>Type</b>        | <b>Salivary Gland Tumor</b>                      | 7   | 0.92 (0.78 to 1.09)  | 0.0                | 2                        | 0.98 (0.70 to 1.39)        | 0.0                | 3                          | 0.85 (0.69 to 1.05)  | 0.0                | 2                       | 1.16 (0.74 to 1.82) | 0.0                |
|                    | <b>Leukemia &amp; Lymphoma</b>                   | 4   | 1.09 (0.92 to 1.28)  | 0.0                | 1                        | 1.04 (0.79 to 1.37)        | -                  |                            | n.a.                 |                    | 3                       | 1.12 (0.90 to 1.39) | 14.2               |

|                              |   |                    |      |   |                     |   |      |   |                     |   |
|------------------------------|---|--------------------|------|---|---------------------|---|------|---|---------------------|---|
| <b>Melanoma</b>              | 2 | 0.84 (.60 to 1.20) | 55.8 | 1 | 1.00 (0.73 to 1.30) | - | n.a. | 1 | 0.70 (0.50 to 1.00) | - |
| <b>Testicular<br/>Cancer</b> | 1 | 1.1 (0.8 to 1.5)   | -    | 1 | 1.1 (0.8 to 1.5)    | - | n.a. |   | n.a.                |   |

n.a., not available; '\*' indicates that cellular phone use statistically significantly increases the risk of tumor.
